# Supplementary material for: Efficient utilization of carbon to produce aromatic valencene in Saccharomyces cerevisiae using mannitol as the substrate
Source: Royal Society of Chemistry journal article supplement (doi:10.1039/d2gc00867j), 2022-01-01
Supplement: d2gc00867j1.pdf [file d2gc00867j1.pdf]

## Supporting Information

### **Efficient utilization of carbon to produce aromatic valencene in *Saccharomyces cerevisiae* using mannitol as substrate**

Chaoyi Zhu<sup>a</sup>, Xia You<sup>a</sup>, Tao Wu<sup>a</sup>, Wen Li<sup>a</sup>, Hefeng Chen<sup>a</sup>, Yaping Cha<sup>a</sup>, Min Zhuo<sup>a</sup>, Bo  
Chen<sup>b\*</sup>, and Shuang Li<sup>a\*</sup>

<sup>a</sup>School of Biology and Biological Engineering, South China University of  
Technology, Guangzhou 510006, China

<sup>b</sup>Beijing Evolyzer Co., Ltd., Beijing 101300, China

\*Corresponding authors:

Shuang Li, School of Biology and Biological Engineering, South China University  
of Technology, Higher Education Mega Center, Guangzhou 510006, China, E-mail:  
shuangli@scut.edu.cn, Tel/Fax: +86 20 3938 0629

Bo Chen, Beijing Evolyzer Co., Ltd., 28 Yuhua Rd., Airport Industrial Zone B,  
Beijing 101300, China, Email: chenbo@evolyzer.com, Tel: +86 10 6457 4198

## Contents

|                                                                                                                                                                         |    |
|-------------------------------------------------------------------------------------------------------------------------------------------------------------------------|----|
| Fig. S1 Optimal flux distribution for valencene production in <i>S. cerevisiae</i> .....                                                                                | 3  |
| Fig. S2 Batch fermentation profiles of the mannitol-assimilating strain during<br>valencene production.....                                                             | 4  |
| Fig. S3 The assimilation of mannitol requires for respiration.....                                                                                                      | 5  |
| Fig. S4 The transcriptional levels of the gene TDH3 of BN-01A and BN-91A on glucose<br>and mannitol compared to those in BN-00 on glucose.....                          | 6  |
| Fig. S5 The transcriptional patterns of genes involving in MVA pathway of the <i>TUP1</i><br>site mutant strains BN-01A and BN-01M and their parental strain BN-00..... | 7  |
| Table S1 Strains used in this study.....                                                                                                                                | 8  |
| Table S2 Plasmids used or constructed in this study.....                                                                                                                | 10 |
| Table S3 Primers used in this study.....                                                                                                                                | 12 |
| Table S4 Possible binding site of the transcriptional factors GIS1 in the upstream of the<br>genes involved in mannitol assimilation.....                               | 17 |
| Notes and references.....                                                                                                                                               | 18 |

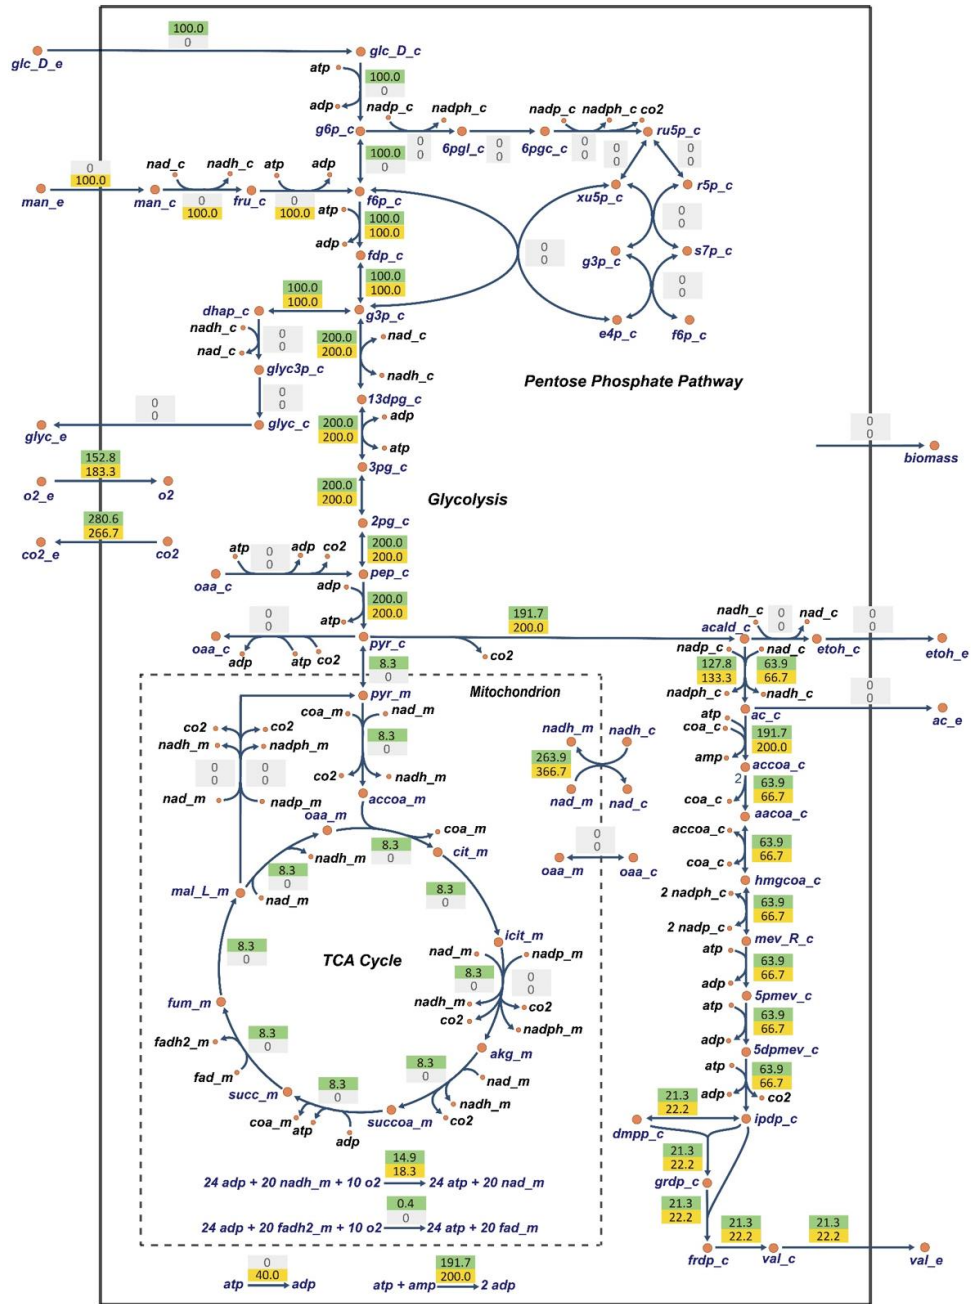

**Fig. S1 Optimal flux distribution for valencene production in *S. cerevisiae*.** A comparison of the theoretical flux distributions for maximum valencene yield on glucose (upper values) and mannitol (lower values). The values indicated the relative molar fluxes (mmol/gDCW/h, DCW = dry cell weight) normalized to glucose or mannitol uptake. Green and yellow reactions respectively represented the active reactions on glucose and mannitol metabolism, while grey reactions are the inactive ones. The metabolites presented in mitochondria, cytoplasm and extracellular were distinguished by the suffixes of “m”, “c”, “e”.

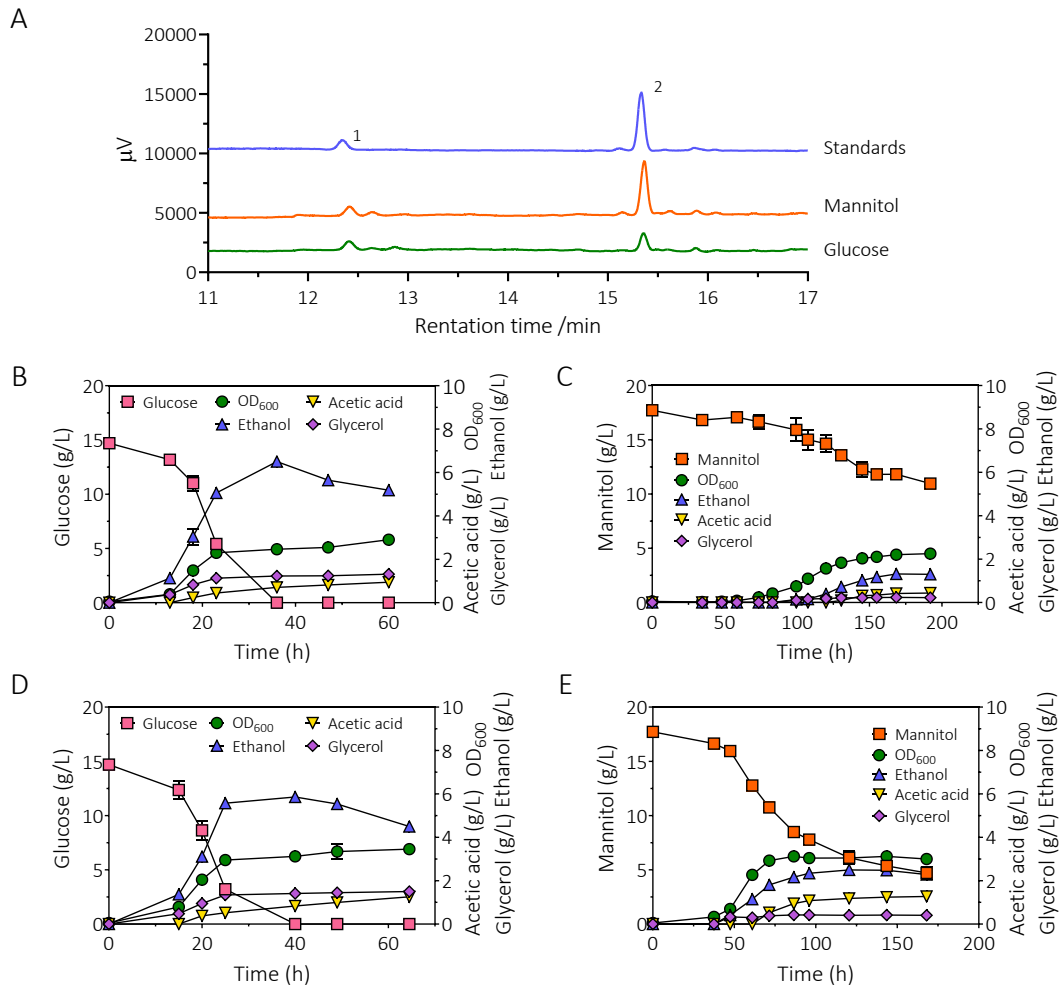

**Fig. S2 Batch fermentation profiles of the mannitol-assimilating strain during valencene production.** **A.** GC-FID chromatogram patterns of the products of BN-91A on glucose and mannitol as well as the standard sample. Peak 1 and 2 represented the internal standard isolongifolene and valencene, respectively. **B&C** Profiles of the strain BN-01A on glucose (B) and mannitol (C) medium. **D&E** Profiles of the strain BN-91A on glucose (D) and mannitol (E). Experiments were performed in triplicate, and error bars represent standard deviations.

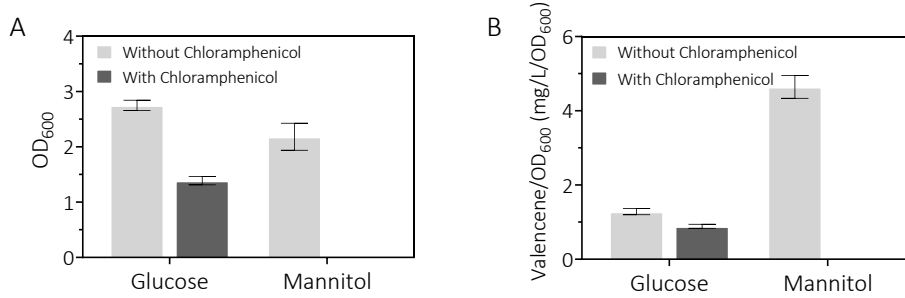

**Fig. S3 The assimilation of mannitol requires for respiration.** Growth (A) and valencene production (B) of the yeast BN-01A in the absence (gray column) or presence (black column) of 4 mg/mL chloramphenicol both under glucose and mannitol condition. The *S. cerevisiae* show a drop in respiratory activity in the presence of chloramphenicol, the inhibitor of the formation of mitochondrial enzymes in *S. cerevisiae*<sup>1</sup>. Experiments were performed in triplicate, and error bars represent standard deviations.

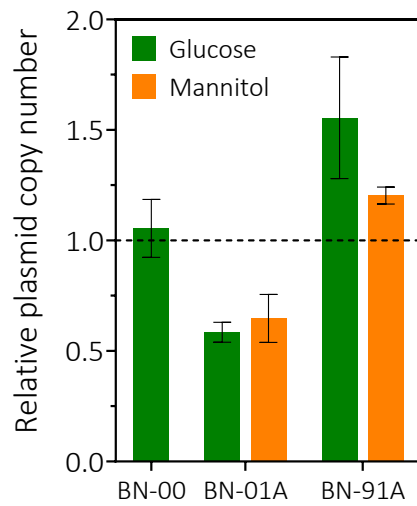

**Fig. S4** The transcriptional levels of the gene *TDH3* of BN-01A and BN-91A on glucose and mannitol compared to those in BN-00 on glucose. *TDH3*, a gene coding glyceraldehyde-3-phosphate dehydrogenase on chromosome, were controlled by the same promoter  $P_{TDH3}$  with *CnVS*. The transcriptional level was quantified by RT-qPCR analysis and normalized to the *ACT1* gene. The transcriptional level of BN-00 on glucose was set to 1 as a control. Mean values and standard deviations of biological triplicates are shown.

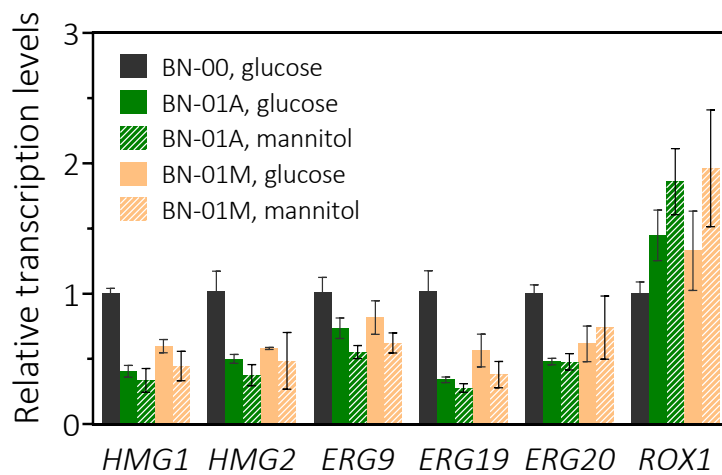

**Fig. S5 The transcriptional patterns of genes involved in the MVA pathway of the *TUP1* site mutant strains BN-01A and BN-01M and their parental strain BN-00.** BN-01A and BN-01M were cultured on both glucose and mannitol media, and BN-00 was cultured on glucose medium. The transcriptional level of the indicated gene was quantified by RT-qPCR analysis and normalized to the *ACT1* gene. Relative transcriptional level of each gene was defined as the ratio of each transcriptional level to the transcriptional level of BN-00 on glucose medium. All values presented are the means of three biological replicates, and error bars represent standard deviations.

**Table S1 Strains used in this study**

| <b>Strain</b>        | <b>Description</b>                                                                                                                                                                                                                       | <b>Source</b>                                         |
|----------------------|------------------------------------------------------------------------------------------------------------------------------------------------------------------------------------------------------------------------------------------|-------------------------------------------------------|
| <i>E. coli</i>       |                                                                                                                                                                                                                                          |                                                       |
| DH5 $\alpha$         | F <sup>-</sup> $\phi$ 80 <i>lacZ</i> $\Delta$ M15 $\Delta$ ( <i>lacZYA-argF</i> ) U169 <i>recA1 endA1 hsdR17</i> ( <i>rK</i> <sup>-</sup> , <i>mK</i> <sup>+</sup> ) <i>phoA supE44</i> $\lambda$ <sup>-</sup> <i>thi-1 gyrA96 relA1</i> | Invitrogen                                            |
| <i>S. cerevisiae</i> |                                                                                                                                                                                                                                          |                                                       |
| BJ5464               | MAT $\alpha$ <i>ura3-52 trp1 leu2</i> $\Delta$ 1 <i>his3</i> $\Delta$ 200 <i>pep4::HIS3 prb1</i> $\Delta$ 1.6R <i>can1 GAL</i>                                                                                                           | ATCC <sup>®</sup> 208288 <sup>TM</sup> , <sup>2</sup> |
| BN-00                | BJ5464, containing YEplac181-P <sub>T<sub>DH3</sub></sub> - <i>CnVS</i> -T <sub>ADH1</sub>                                                                                                                                               | <sup>3</sup>                                          |
| BN-01A               | Derived from BN-00, screened through ALE, <i>TUPI</i> R391X                                                                                                                                                                              | This study                                            |
| BN-01M               | Derived from BN-00, <i>TUPI</i> C1117T by site-specific mutagenesis                                                                                                                                                                      | This study                                            |
| BN-01MG              | Derived from BN-01M, <i>GIS1</i> T1036del by site-specific mutagenesis                                                                                                                                                                   | This study                                            |
| BN-91A               | Derived from BN-01A                                                                                                                                                                                                                      | This study                                            |
| BN-911A              | BN-91A, $\downarrow$ <i>ERG9</i>                                                                                                                                                                                                         | This study                                            |



---

|            |                                                                                                        |            |
|------------|--------------------------------------------------------------------------------------------------------|------------|
| BN-912A    | BN-911A, $\Delta ROX1::P_{TEF1}$ - <i>tHMG1</i> - $T_{CYC1}$ - $P_{TDH3}$ - <i>ERG12</i> - $T_{ADH1}$  | This study |
| BN-913A    | BN-912A, $\Delta BTS1::P_{TEF1}$ - <i>tHMG1</i> - $T_{CYC1}$ - $P_{PDC1}$ - <i>CnVS</i> - $T_{SAG1}$   | This study |
| BN-914A    | BN-913A, $\Delta HO::P_{SED1}$ - <i>HXT13</i> - $T_{SAG1}$ - $P_{CDC19}$ - <i>DSF1</i> - $T_{ENO2}$    | This study |
| BN-915A    | BN-914A, $\Delta ATG14::P_{PGK1}$ - <i>tPOS5</i> - $T_{ENO2}$ - $P_{PDC1}$ - <i>CnVS</i> - $T_{SAG1}$  | This study |
| BN-915A(+) | BN-915A, $\Delta YPL062W::P_{URA3}$ - <i>URA3</i> - $T_{URA3}$ - $P_{TRP1}$ - <i>TRP1</i> - $T_{TRP1}$ | This study |

---

**Table S2 Plasmids used or constructed in this study**

| <b>Plasmid</b>         | <b>Description</b>                                                                                                     | <b>Reference</b> |
|------------------------|------------------------------------------------------------------------------------------------------------------------|------------------|
| YEplac181              | <i>S. cerevisiae</i> - <i>E. coli</i> shuttle vector, High-copy (2 $\mu$ ), <i>LEU2</i> , <i>Amp</i> <sup>R</sup>      |                  |
| YEplac181- <i>CnVS</i> | YEplac181 derived, P <sub>TDH3</sub> - <i>CnVS</i> -T <sub>ADH1</sub>                                                  | 3                |
| p426                   | p426-P <sub>SNR52</sub> -T <sub>SUP4</sub> , 2 $\mu$ ori, <i>URA3</i> , <i>Amp</i> <sup>R</sup>                        | Addgene          |
| P426-Cas9              | p426 derived, P <sub>SNR52</sub> -T <sub>SUP4</sub> -P <sub>TEF1</sub> -Cas9-T <sub>CYC1</sub>                         | This study       |
| P426- <i>TUP1</i>      | P426-Cas9 derived, P <sub>SNR52</sub> -gRNA. <i>TUP1</i> -T <sub>SUP4</sub> -P <sub>TEF1</sub> -Cas9-T <sub>CYC1</sub> | This study       |
| P426- <i>GIS1</i>      | P426-Cas9 derived, P <sub>SNR52</sub> -gRNA. <i>GIS1</i> -T <sub>SUP4</sub> -P <sub>TEF1</sub> -Cas9-T <sub>CYC1</sub> | This study       |
| p414-Cas9              | p414-P <sub>TEF1</sub> -Cas9-T <sub>CYC1</sub> , CEN/ARS, <i>TRP1</i> , <i>Amp</i> <sup>R</sup>                        | Addgene          |
| P426-CL                | p426 derived, p426-loxP-Ori-loxP-P <sub>GAL1</sub> -Cre-T <sub>CYC1</sub> -P <sub>SNR52</sub> -T <sub>SUP4</sub>       | 3                |
| P426- <i>ERG9</i>      | p426-CL derived, P <sub>SNR52</sub> -gRNA. <i>ERG9</i> -T <sub>SUP4</sub>                                              | 3                |
| P426- <i>BTS1</i>      | p426-CL derived, P <sub>SNR52</sub> -gRNA. <i>BTS1</i> -T <sub>SUP4</sub>                                              | 3                |
| P426- <i>ROX1</i>      | p426-CL derived, P <sub>SNR52</sub> -gRNA. <i>ROX1</i> -T <sub>SUP4</sub>                                              | 3                |

---

|                               |                                                                                                                             |            |
|-------------------------------|-----------------------------------------------------------------------------------------------------------------------------|------------|
| P426- <i>YPL062W</i>          | p426-CL derived, P <sub>SNR52</sub> -gRNA. <i>YPL062W</i> -T <sub>SUP4</sub>                                                | 3          |
| P426- <i>HO</i>               | p426-CL derived, P <sub>SNR52</sub> -gRNA. <i>HO</i> -T <sub>SUP4</sub>                                                     | This study |
| P426- <i>ATG14</i>            | p426-CL derived, P <sub>SNR52</sub> -gRNA. <i>ATG14</i> -T <sub>SUP4</sub>                                                  | This study |
| YEplac181- <i>tHMG1-ERG12</i> | YEplac181 derived, P <sub>TEF1</sub> - <i>tHMG1</i> -T <sub>CYC1</sub> -P <sub>TDH3</sub> - <i>ERG12</i> -T <sub>ADH1</sub> | This study |
| YEplac181- <i>tHMG1-CnVS</i>  | YEplac181 derived, P <sub>TEF1</sub> - <i>tHMG1</i> -T <sub>CYC1</sub> -P <sub>PDC1</sub> - <i>CnVS</i> -T <sub>SAG1</sub>  | This study |
| YEplac181- <i>HXT13-DSF1</i>  | YEplac181 derived, P <sub>SED1</sub> - <i>HXT13</i> -T <sub>SAG1</sub> -P <sub>CDC19</sub> - <i>DSF1</i> -T <sub>ENO2</sub> | This study |
| YEplac181- <i>POS5-CnVS</i>   | YEplac181 derived, P <sub>PGK1</sub> - <i>POS5</i> -T <sub>ENO2</sub> -P <sub>PDC1</sub> - <i>CnVS</i> -T <sub>SAG1</sub>   | This study |
| YEplac181- <i>tPOS5-CnVS</i>  | YEplac181 derived, P <sub>PGK1</sub> - <i>tPOS5</i> -T <sub>ENO2</sub> -P <sub>PDC1</sub> - <i>CnVS</i> -T <sub>SAG1</sub>  | This study |
| YEplac181- <i>URA3-TRP1</i>   | YEplac181 derived, P <sub>URA3</sub> - <i>URA3</i> -T <sub>URA3</sub> -P <sub>TRP1</sub> - <i>TRP1</i> -T <sub>TRP1</sub>   | This study |

---

**Table S3 Primers used in this study.**

| <b>Primer</b> | <b>Sequence (5'-3')</b>  | <b>Description</b>                     |
|---------------|--------------------------|----------------------------------------|
| ACT1-F        | GTCGGTAGACCAAGACAC       | Primers for Real-time quantitative PCR |
| ACT1-R        | AGAAGGTATGATGCCAGA       |                                        |
| HXT13-F       | ATAGCGATGGAGATGT         |                                        |
| HXT13-R       | TCCCCGTTTATGACTT         |                                        |
| HXT15-F       | GAGGCCTGTGTCTCCATCGCC    |                                        |
| HXT15-R       | CACAAGAATACCTGTGATCAAACG |                                        |
| HXT17-F       | TAACACTGCACAATGGAGAGTCC  |                                        |
| HXT17-R       | TGAGTACCCATGGATCCTCTGG   |                                        |
| DSF1-F        | TGTTGCTGGCTGGTTCCGTTAC   |                                        |
| DSF1-R        | GCGGCTGCCTTCAAGGTTGG     |                                        |
| YNR071C-F     | AGGCGTCCCCTGTTGAGAATCC   |                                        |

---

|           |                          |  |
|-----------|--------------------------|--|
| YNR071C-R | CGTTAGGGTTGGGCTGTGTGTG   |  |
| CnVS-F    | CTGAAGAAGCCACATA         |  |
| CnVS-R    | AATCAAGACGGCACTA         |  |
| ALG9-F    | ATCGTGAAATTGCAGGCAGCTTGG |  |
| ALG9-R    | CATGGCAACGGCAGAAGGCAATAA |  |
| TDH3-F    | ATCATCCCATCCTCC          |  |
| TDH3-R    | GACTCTGAAAGCCATAC        |  |

---

|        |                                             |                                                          |
|--------|---------------------------------------------|----------------------------------------------------------|
| Cas9-F | CTAAAGGGAACAAAAGCTGGCATAGCTTCAAATGTTTCTA    | For creation of<br><i>TUPI</i> and <i>GIS1</i><br>mutant |
| Cas9-R | ATACATTATCTTTTCAAAGAGCAAATTAAGCCTTCGAGCGTCC |                                                          |
| gRNA-F | GCTCGAAGGCTTTAATTTGCTCTTTGAAAAGATAATGTATGAT |                                                          |
| gRNA-R | AGAAACATTTTGAAGCTATGCCAGCTTTTGTTCCTTTAGT    |                                                          |
| Tong-F | TAATAATGGTTTCTTAGTATGA                      |                                                          |
| Tong-R | ACTAAGAAACCATTATTATCAT                      |                                                          |

---

|               |                                                                  |                  |
|---------------|------------------------------------------------------------------|------------------|
| gRNA.TUP1-F   | AAATAACACCACCACGTCCAGTTTTAGAGCTAGAAATA                           |                  |
| gRNA.TUP1-R   | TGGACGTGGTGGTGTATTGATCATTATCTTTCACTGC                            |                  |
| gRNA.GIS1-F   | TCTAATGAGTCGGAGCAACGGTTTTAGAGCTAGAAATA                           |                  |
| gRNA.GIS1-R   | CGTTGCTCCGACTCATTAGAGATCATTATCTTTCACTGC                          |                  |
| donor. TUP1-F | CTGACGATTCTGCTGCCAATAACCATtGAAATTCGATCACTGAAAATA<br>ACACCACCACG  |                  |
| donor. TUP1-R | TTGTGGTGGTAGTAGTGGTTGTCATTGTATTGTTATCgGTGGACGTGGT<br>GGTGTTATTT  |                  |
| donor. GIS1-F | AAATGCGGCTGTGGAAACAAGAAGGAAGAGCGAAAATCTGGTCCGT<br>TTTCAAATTTATC  |                  |
| donor. GIS1-R | TATCAGTAATGGAGCtTCGTTGCTCCGCTCATTAGAATCATAAGATAAA<br>TTTGAAAACG  |                  |
| donor. ERG9-F | CTCTGACTCAGTACATTTTCATAGCCCATCTTCAACAACAATACCGACT<br>TATCGGAAGGC | For optimization |
| donor. ERG9-R | GCTCGTTTAGGCACTAAACCCAAAACCGATAACGCCTTCCGATAAGT<br>CGGTATTGTT    | of the metabolic |

---

|                        |                                                                 |                                 |
|------------------------|-----------------------------------------------------------------|---------------------------------|
| donor. ROX1_tHMG1-R    | TGGACCGCTCAAGGTGTGGAAATACCCCATAATTCAAACAGCAAATT<br>AAAGCCTTCGA  | pathway in<br><br>Strain BN-91A |
| donor. ROX1_ERG12-F    | AGACCCAAGAACGCATTTATTCTGTTCAGACAGCACTACCCATAGGG<br>TAGGGGAATTT  |                                 |
| donor. BTS1_tHMG1-R    | TTATAAGGTTTTGAAATCAAGCTTTCATTTTGGCTtcaAAAACGACGGC<br>CAGTGAATTC |                                 |
| donor. BTS1_CnVS-F     | GTCTGGAAAATCAATGGAGGCCAAGATAGATGAGCCACACAGGAAA<br>CAGCTATGACCAT |                                 |
| donor. HO_HXT13-R      | GCCAGTTAAAGGACCAGAGTGTATAAAATGTGGCGGAATCTGAATTC<br>GAGCTCGGTAC  |                                 |
| donor. HO_DSf1-F       | GCGCGCACCTGCGTTGTTACCACAACCTTATGAGGCCCGAACAATT<br>TCACACAGGAA   |                                 |
| donor. ATG14_(t)POS5-R | AATAGTCTCATGAAGTTAGATGTTTTACGAATGAAAAAGATGAATTCG<br>AGCTCGGTAC  |                                 |
| donor. ATG14_CnVS-F    | TCCTTTTACTATAAATCCGCTCATTAGCTGTTCTATCCTAGCTATGAC<br>CATGATTAC   |                                 |

---

---

|                   |                                                                 |
|-------------------|-----------------------------------------------------------------|
| donor. 062_URA3-F | AGGAACTGCCGTCACATACGACACTGCCCCTCACGTAAGGGCAGAG<br>CTTTTCAATTCAT |
| donor. 062_TRP1-R | CCCCGAATTTATTACGAATTTGCCACATGGTCGGTGGAGCTCAGGC<br>AAGTGCACAAAC  |

---



**Table S4 Possible binding site of the transcriptional factors GIS1 in the upstream of the genes involved in mannitol assimilation**

The first base upstream the initiation codon (ATG) was indicated as the site -1, and so on.

| <b>Transcriptional factor</b> | <b>GIS1</b>                        |
|-------------------------------|------------------------------------|
| <b>Gene</b>                   |                                    |
| <i>HXT13</i>                  | -213- -217, -516- -520, -794- -798 |
| <i>HXT15</i>                  | -712- -716                         |
| <i>HXT17</i>                  | -690- -694                         |
| <i>DSF1</i>                   | -871- -875                         |
| <i>MAN1</i>                   | -198- -202                         |
| <i>YNR071C</i>                | -493- -497                         |

### Notes and references

1. M. Huang, D. R. Biggs, G. D. Clark-Walker and A. W. Linnane, *Biochim. Biophys. Acta, Nucleic Acids Protein Synth.*, 1966, **114**, 434-436.
2. E. W. Jones, *Methods Enzymol.*, 1991, **194**, 428-453.
3. H. Chen, C. Zhu, M. Zhu, J. Xiong, H. Ma, M. Zhuo and S. Li, *Microb. Cell Fact.*, 2019, **18**, 195.
