# Supplementary material for: Efficient utilization of carbon to produce aromatic valencene in Saccharomyces cerevisiae using mannitol as the substrate
Source: Royal Society of Chemistry journal article supplement (doi:10.1039/d2gc00867j), 2022-01-01
Supplement: d2gc00867j2.xlsx [file d2gc00867j2.xlsx]

## Sheet: Table S5 Genomic Data
Table S5 Genomic sequencing data.
Unique variants were detected by comparing the genome of BN-01A and BN-91A to BN-00. SNV, single nucleotide variant; Indel, insertion or deletion.
Type	Res	Obs	Func	Gene	AAChange	Locus	Description*
Mutation both in BN-01A and BN-91A
SNV	G	T	exonic	YBL100W-A	A242S	transposable element gene	Retrotransposon TYA Gag gene co-transcribed with TYB Pol; translated as TYA or TYA-TYB polyprotein; Gag is a nucleocapsid protein that is the structural constituent of virus-like particles (VLPs); similar to retroviral Gag
SNV	T	C	exonic	YBL100W-A	A242A
SNV	G	A	exonic	YBL100W-A	K263K
SNV	G	T	exonic	YBL020W	A2S	RFT1	Membrane protein required for translocation of Man5GlcNac2-PP-Dol; required for translocation of Man5GlcNac2-PP-Dol from the cytoplasmic side to the lumenal side of the ER membrane but is not the flippase; mutation is suppressed by expression of human p53 protein; essential gene Protein involved in glycolipid translocation; localizes to endoplasmic reticulum membrane
SNV	A	T	downstream	YBR209W(dist=966)			Putative protein of unknown function; conserved across S. cerevisiae strains; YBR209W is not an essential gene
SNV	G	A	exonic	YCR084C	R391X	TUP1	General repressor of transcription, forms complex with Cyc8p; involved in the establishment of repressive chromatin structure through interactions with histones H3 and H4 and stabilization of nucleosomes over promoters; appears to enhance expression of some genes
SNV	A	G	intergenic	YDR210W-A(dist=7269), YDR210C-C(dist=1908)			Predicted tail-anchored plasma membrane protein; contains a conserved CYSTM module; related proteins in other organisms may be involved in response to stress; green fluorescent protein (GFP)-fusion protein localizes to the cell periphery; Protein whose biological role and cellular location are unknown
SNV	T	C	exonic	YFL042C	T635A	LAM5	Lipid transfer protein Anchored at Membrane contact site Putative sterol transfer protein; one of six StART-like domain-containing proteins in yeast that may be involved in sterol transfer between intracellular membranes; conserved across eukaryotes; has both GRAM and StART-like (VASt) domains; localizes to membrane contact sites throughout the cell, including nucleus-vacuole junctions and ER-mit…
SNV	A	G	upstream	YGL100W(dist=77);		SEH1	Subunit of the Nup84 nuclear pore and SEACAT subcomplexes; involved in nucleocytoplasmic transport and NPC biogenesis in the nuclear pore subcomplex; subunit of SEACAT, a subcomplex of the SEA complex that inhibits the TORC1 inhibitory role of SEACIT (Iml1p-Npr2p-Npr3p), a GAP for Gtr1p in response to amino acid limitation, thereby resulting in activation of TORC1 signaling; SEA is a coatomer-rel…
			downstream	YGL101W(dist=317)		YGK1	5'-deoxynucleotidase involved in deoxyribonucleoside monophosphate degradation; non-essential gene; interacts with the DNA helicase Hpr5p; YGL101W has a paralog, YBR242W, that arose from the whole genome duplication; localizes to the nucleus and cytoplasm in a large-scale study
SNV	A	T	exonic	YLR001C	L501L		Putative protein of unknown function; the authentic, non-tagged protein is detected in highly purified mitochondria in high-throughput studies; predicted to be palmitoylated; localizes to the mitochondrion and the vacuolar membrane in large-scale studies
SNV	G	C	exonic	YLR362W	G538A	STE11	Signal transducing MEK kinase; involved in signal transduction during pseudohyphal growth, hyperosmotic response, filamentous growth, mating in response to pheromone, and the cell integrity pathway; also involved in regulation of RNA-mediated transposition and the cellular response to heat; localizes to the cytoplasm; involved in pheromone response and pseudohyphal/invasive growth pathways where …
INDEL	-	AAAAAAAAAGTAAGCCTCATCATCGAAAAAAGACATAAAAGAGAGGCTTACTTTTTCTTTCAACTAAGCCTTGAAA	upstream	YBR004C(dist=96)		GPI18	lpha-1,6-mannosyltransferase involved in GPI anchor biosynthesis; mannosyltransferase that transfers the second mannose in glycosylphosphatidylinositol biosynthesis; the authentic, non-tagged protein was localized to mitochondriasubunit of a mannosyltransferase complex;
				YBR005W(dist=143)		RCR1	Integral protein component of endoplasmic reticulum membrane; Plasma membrane (PM) ubiquitin ligase-substrate adaptor; involved in vesicle-medated transport and chitin localization; involved in cell wall chitin deposition; ubiquitinates and down-regulates chitin synthase Chs3p abundance at PM via calcineurin/Crz1 signaling pathway which regulates RCR1 expression; delivered to PM by exomer complex…
INDEL	T	-	downstream	YBR301W		PAU24	Cell wall mannoprotein; has similarity to Tir1p, Tir2p, Tir3p, and Tir4p; member of the seripauperin multigene family encoded mainly in subtelomeric regions; expressed under anaerobic conditions, completely repressed during aerobic growth
				YBR302C(dist=545)		COS2	Endosomal protein involved in turnover of plasma membrane proteins; member of the DUP380 subfamily of conserved, often subtelomeric COS genes; required for the multivesicular vesicle body sorting pathway that internalizes plasma membrane proteins for degradation; Cos proteins provide ubiquitin in trans for nonubiquitinated cargo proteins
INDEL	-	T	downstream	YDR541C(dist=716)			Aldehyde reductase with a role in detoxifying furfural; substrates include both aromatic and aliphatic aldehydes; uses NADPH as cofactor; SWAT-GFP and mCherry fusion proteins localize to the endoplasmic reticulum and vacuole respectively
INDEL	A	-	upstream	YLR278C(dist=115);			Zinc-cluster protein; GFP-fusion protein localizes to the nucleus; mutant shows moderate growth defect on caffeine; has a prion-domain like fragment that increases frequency of [URE3]; associates with rDNA chromatin in vivo; YLR278C is not an essential gene
			downstream	YLR281C(dist=354)		RSO55	Mitochondrial protein of unknown function; green fluorescent protein (GFP)-fusion protein localizes to mitochondria; YLR281C is not an essential gene
INDEL	-	ATTCTATATATCCATAACATTGCCTACATATAATCCGAGAGGTTACGACAACATTCACATAATAAGGGTAGTAC	upstream	YML054C-A(dist=567);			Putative protein of unknown function
			downstream	YML053C(dist=768)			Putative protein of unknown function; green fluorescent protein (GFP)-fusion protein localizes to the cytoplasm and the nucleus; overexpression causes a cell cycle delay or arrest; YML053C is not an essential gene
INDEL	-	C	upstream	YPR114W(dist=56);			Predicted integral membrane protein whose biological role is unknown; localizes to the endoplasmic reticulum in a large-scale study;Protein with distant similarity to ceramide synthase paralogs Lag1p and Lac1p; mutation confers sensitivity to inhibitors of sphingolipid biosynthesis
			downstream	YPR113W(dist=326)		PIS1	Phosphatidylinositol synthase; required for biosynthesis of phosphatidylinositol, which is a precursor for polyphosphoinositides, sphingolipids, and glycolipid anchors for some of the plasma membrane proteins; integral to membrane and localizes to Golgi apparatus and mitochondrial outer membrane, to endoplasmic reticulum in high-throughput studies
Mutation in BN-91A
SNV	G	C	exonic	YAL063C	I699M	FLO9	Putative mannose-binding protein of the cell wall involved in flocculation and cell-surface adhesion; Lectin-like protein with similarity to Flo1p
SNV	G	A	exonic	YAL063C	T284T	FLO9
SNV	T	C	exonic	YAL063C	E281E	FLO9
SNV	C	G	exonic	YAL063C	T280T	FLO9
SNV	A	T	downstream	YCL073C(dist=320)		GEX1	Proton:glutathione antiporter; localized to the vacuolar and plasma membranes; imports glutathione from the vacuole and exports it through the plasma membrane; has a role in resistance to oxidative stress and modulation of the PKA pathway; GEX1 has a paralog, GEX2, that arose from a segmental duplication
SNV	C	T	downstream	YCL073C(dist=289)		GEX1
SNV	G	A	downstream	YCL073C(dist=258)		GEX1
SNV	G	T	downstream	YCL073C(dist=253)		GEX1
SNV	C	G	downstream	YCL073C(dist=229)		GEX1
SNV	C	T	downstream	YCL073C(dist=228)		GEX1
SNV	C	T	downstream	YCL073C(dist=223)		GEX1
SNV	C	T	exonic	YCR018C	E97K	SRD1	Protein involved in the processing of pre-rRNA to mature rRNA; contains a C2/C2 zinc finger motif; srd1 mutation suppresses defects caused by the rrp1-1 mutation
SNV	G	A	upstream	YCR027C(dist=602)		RHB1	Putative Rheb-related GTPase; involved in regulating canavanine resistance and arginine uptake; involved in transport of arginine and lysine, and retrograde transport from endosome to Golgi apparatus; member of the Ras superfamily of G-proteins
SNV	A	G	downstream	YJR056C(dist=863)		-	Protein of unknown function; green fluorescent protein (GFP)-fusion protein localizes to both the cytoplasm and the nucleus; relative distribution to the nucleus increases upon DNA replication stress
SNV	CG	GC	exonic	YJR161C	P50R	COS5	Endosomal protein involved in turnover of plasma membrane proteins; member of the DUP380 subfamily of conserved, often subtelomeric COS genes; required for the multivesicular vesicle body sorting pathway that internalizes plasma membrane proteins for degradation; Cos proteins provide ubiquitin in trans for nonubiquitinated cargo proteins
SNV	T	C	downstream	YLR154C-H,			Putative protein of unknown function; identified by fungal homology comparisons and RT-PCR; this ORF partially overlaps RDN5-2; YLR154C-H has a paralog, YLR157C-C, that arose from a segmental
				YLR155C(dist=126)		ASP3-1	Cell-wall L-asparaginase II involved in asparagine catabolism; expression induced during nitrogen starvation; ORF contains a short non-coding RNA that enhances expression of full-length gene; likely arose in via horizontal gene transfer from the wine yeast Wickerhamomyces anomalus or a close relative; reference strain S288C has four copies of ASP3; ASP3-1 has a paralog, ASP3-3, that arose from a …
SNV	T	A	downstream	YPR137W(dist=823)		RRP9	Protein involved in pre-rRNA processing; U3 snoRNA-binding protein involved in processing of tricistronic pre-rRNA transcript; localized to nucleolus component of small ribosomal subunit (SSU) processosome; ortholog of the human U3-55k protein
INDEL	AGGTAA	-	exonic	YAL063C	332_334del	FLO9	Putative mannose-binding protein of the cell wall involved in flocculation and cell-surface adhesion; Lectin-like protein with similarity to Flo1p
INDEL	CTGTTCCATGGCTCAGTTGTAGTTATGATGGTGCTAGCAGTTGTTGGAGTTCTGATGACAATGACGGTTTCGTCAGTTGGAACGCCGTTGGTACCGGTGACGGTGGTCATTTCAGTAGATGTA	-	exonic	YAL063C	289_330del,	FLO9
INDEL	AAAGTA	-	exonic	YAL063C	285_287del	FLO9
INDEL	AAA	-	upstream	YCL055W		KAR4;	Transcription factor required for response to pheromones; Sequence specific DNA-binding transcription factor involved in response to mating pheromone; also required during meiosis; exists in two forms, a slower-migrating form more abundant during vegetative growth and a faster-migrating form induced by pheromone; null mutant exhibits abnormal lipid metabolic phenotype
			upstream	YCL056C(dist=268);		PEX34;	Protein that regulates peroxisome populations; peroxisomal integral membrane protein involved in the organization and biogenesis of peroxisomes; interacts with Pex11p, Pex25p, and Pex27p to control both constitutive peroxisome division and peroxisome morphology and abundance during peroxisome proliferation
			downstream	YCL057W(dist=753)		PRD1	Zinc metalloendopeptidase; found in the cytoplasm and intermembrane space of mitochondria; with Cym1p, involved in degradation of mitochondrial proteins and of presequence peptides cleaved from imported proteins; protein abundance increases in response to DNA replication stress
INDEL	-	TGGAATAAAAA	exonic	YCR018C	N96fs	SRD1	Protein involved in the processing of pre-rRNA to mature rRNA; contains a C2/C2 zinc finger motif; srd1 mutation suppresses defects caused by the rrp1-1 mutation
INDEL	-	CTATCATCTACTAACT	exonic	YCR018C	L95_N96delinsSX	SRD1
INDEL	-	TATTTACGTTACT	exonic	YCR018C	S94_L95delinsX	SRD1
INDEL	-	TATATTAT	exonic	YCR018C	S93_S94delinsRX	SRD1
INDEL	-	T	upstream	YDR045C(dist=236);		RPC11	DNA-directed RNA polymerase III subunit C11; mediates pol III RNA cleavage activity and is important for termination of transcription; homologous to TFIIS
			upstream	YDR044W		HEM13	Coproporphyrinogen III oxidase; oxygen-requiring enzyme that catalyzes sixth step in heme biosynthetic pathway; transcription is repressed by oxygen and heme (via Rox1p and Hap1p); human homolog CPOX can complement yeast mutant and allow growth of haploid null after sporulation of a heterozygous diploid
			downstream	YDR046C(dist=216)		BAP3	Amino acid permease; involved in uptake of cysteine, leucine, isoleucine and valine; BAP3 has a paralog, BAP2, that arose from the whole genome duplication; Non-essential gene; null mutant displays increased competitive fitness in minimal media; heterozygous diploid null is haploinsufficient; overexpression results in a decreased growth rate
INDEL	T	-	exonic	YDR096W	S346fs	GIS1	Histone demethylase and transcription factor; regulates genes during nutrient limitation; activity modulated by proteasome-mediated proteolysis; has JmjC and JmjN domain in N-terminus that interact, promoting stability and proper transcriptional activity; contains two transactivating domains downstream of Jmj domains and a C-terminal DNA binding domain; relocalizes to the cytosol in response to h…
INDEL	-	G	exonic	YHR084W	M469fs	STE12	Transcription factor that is activated by a MAPK signaling cascade; activates transcription of genes involved in mating in response to pheromone and genes involved in filamentous growth in response to nutrient limitation;activates genes involved in mating or pseudohyphal/invasive growth pathways; cooperates with Tec1p transcription factor to regulate genes specific for invasive growth; Non-essent…
INDEL		ATATATATATATATAC	upstream	YJR033C		RAV1	Subunit of RAVE complex (Rav1p, Rav2p, Skp1p); the RAVE complex promotes assembly of the V-ATPase holoenzyme; required for transport between the early and late endosome/PVC and for localization of TGN membrane proteins; potential Cdc28p substrate
			upstream	YJR035W(dist=34)		RAD26	Protein involved in transcription-coupled nucleotide excision repair; repairs UV-induced DNA lesions; recruitment to DNA lesions is dependent on an elongating RNA polymerase II; homolog of human CSB protein
	-		downstream	YJR034W(dist=312)		PET191	Protein required for assembly of cytochrome c oxidase; exists as an oligomer; described as both an integral mitochondrial inner membrane protein facing the intermembrane space (IMS) and as a soluble IMS protein; contains a twin Cx9C motif; imported into the IMS via the MIA import machinery
INDEL	-	AAT	upstream	YLR223C		IFH1	Coactivator, regulates transcription of ribosomal protein (RP) genes; recruited to RP gene promoters during optimal growth conditions via Fhl1p; subunit of CURI, a complex that coordinates RP production and pre-rRNA processing; regulated by acetylation and phosphorylation at different growth states via TORC1 signaling; IFH1 has a paralog, CRF1, that arose from the whole genome duplication
			upstream	YLR224W(dist=522)		UCC1	F-box protein and component of SCF ubiquitin ligase complexes; involved in ubiquitin-dependent protein catabolism; readily monoubiquitinated in vitro by SCF-Ubc4 complexes; SCF-Ucc1 regulates level of Cit2 citrate synthase protein to maintain citrate homeostasis, acts as metabolic switch for glyoxylate cycle; UCC1 transcription is downregulated in cells grown on C2-compounds
INDEL	TT	-	upstream	YLR249W(dist=227);		YEF3	Translation elongation factor 3; contains two ABC cassettes; binds and hydrolyzes ATP; interacts with mRNA independently of translation; YEF3 has a paralog, HEF3, that arose from the whole genome duplication
			downstream	YLR248W(dist=468)		RCK2	Protein kinase involved in response to oxidative and osmotic stress; identified as suppressor of S. pombe cell cycle checkpoint mutations; similar to CaM (calmodulin) kinases; RCK2 has a paralog, RCK1, that arose from the whole genome duplication
INDEL	-	AGAGTTGAAGAGTGGGTGAATTTTGAGATAATTGTTGGGATTCCATTGTTGACTAAGGCTATAATATTAGGTATACAGAATATACTAGTAATGTAAATACTAGTTAGTAGATGATAGTTGATTTCTATTCCAACA	intergenic	YLR332W(dist=1434)		MID2	O-glycosylated plasma membrane protein; Transmembrane signaling receptor involved in cell wall organization, cell morphogenesis related to mating, and endoplasmic reticulum unfolded protein response; acts as a sensor for cell wall integrity signaling and activates the pathway; interacts with Rom2p, a guanine nucleotide exchange factor for Rho1p, and with cell integrity pathway protein Zeo1p; MID2…
				YLR333C(dist=2333)		RPS25B	Protein component of the small (40S) ribosomal subunit; involved in translation; homologous to mammalian ribosomal protein S25, no bacterial homolog; RPS25B has a paralog, RPS25A, that arose from the whole genome duplication
INDEL	-	TTTTTTTCA	upstream	YML042W		CAT2	Carnitine acetyl-CoA transferase; present in both mitochondria and peroxisomes; transfers activated acetyl groups to carnitine to form acetylcarnitine which can be shuttled across membranes
			upstream	YML043C(dist=783)		RRN11	Component of the core factor (CF) rDNA transcription factor complex; CF is required for transcription of 35S rRNA genes by RNA polymerase I and is composed of Rrn6p, Rrn7p, and Rrn11p; involved in transcription of the nuclear large rRNA transcript; binds TATA-binding protein TBP; subunit of the RNA polymerase I core factor complex
INDEL	-	AAAAAAA	upstream	YNR074C		AIF1	Mitochondrial cell death effector; translocates to the nucleus in response to apoptotic stimuli; triggers apoptosis in cells lacking HXK2; homolog of mammalian Apoptosis-Inducing Factor, putative reductase
			upstream	YNR075W(dist=608)		COS10	Endosomal protein involved in turnover of plasma membrane proteins; member of the DUP380 subfamily of conserved, often subtelomeric COS genes; required for the multivesicular vesicle body sorting pathway that internalizes plasma membrane proteins for degradation; Cos proteins provide ubiquitin in trans for nonubiquitinated cargo proteins Non-essential gene; in systematic studies null mutant grows…
*All information in Description was search from The Saccharomyces Genome Database (SGD), URL: https://www.yeastgenome.org

## Sheet: Table S6 Metabolic Network 
Table S6 Metabolic network of S. cerevisiae
Enzyme	Gene	Reaction	Reaction shorthand
Transport
Hexose transporter	HXT10/ HXT11/ HXT13/ HXT14/ HXT15/ HXT16/ HXT17/ HXT3/ HXT4/ HXT5/ HXT6/ HXT7/ HXT8/ HXT9/ HXT1/ HXT2/ GAL2/ MAL11/ MPH2/ MPH3	D-glucose[e] => D-glucose[c]	glc_D_e => glc_D_c
Polyol transporter	HXT13/ HXT15/ HXT17	mannitol[e] => mannitol[c]	man_e => man_c
-	-	ethanol[c] => ethanol[e]	etoh_c => etoh_e
-	-	glycerol[c] => glycerol[e]	glyc_c => glyc_e
-	-	acetate[c] => acetate[e]	ac_c => ac_e
-	-	O2[e] => O2	o2_e = > o2
-	-	CO2 => CO2 [e]	co2 => co2_e
		valencene[c] => valencene[e]	val_c => val_e
Glycolysis
Glucose kinase and hexokinase	GLK1/ HXK1/ HXK2	ATP + D-glucose[c] => ADP + D-glucose 6-phosphate[c]	glc_D_c + atp => g6p_c + adp
Glucose-6-phosphate isomerase	PGI1	glucose 6-phosphate[c] <=> D-fructose 6-phosphate[c]	g6p_c <=> f6p_c
6-phosphofructokinase	PFK1/ PFK2	ATP + D-fructose 6-phosphate[c] => ADP + D-fructose 1,6-bisphosphate[c]	f6p_c + atp => fdp_c + adp
Fructose-bisphosphate aldolase	FBA1	D-fructose 1,6-bisphosphate[c] <=> dihydroxyacetone phosphate[c] + glyceraldehyde 3-phosphate[c]	fdp_c <=> g3p_c + dhap_c
Triosephosphate isomerase	TPI1	dihydroxyacetone phosphate[c] <=> glyceraldehyde 3-phosphate[c]	dhap_c <=> g3p_c
Glyceraldehyde 3-phosphate dehydrogenase	TDH1/ TDH2/ TDH3	glyceraldehyde 3-phosphate[c] + NAD[c] <=> 1,3-bisphospho-D-glycerate[c] + NADH[c]	nad_c + g3p_c <=> nadh_c + 13dpg_c
Phosphoglycerate kinase	PGK1	1,3-bisphospho-D-glycerate[c] + ADP <=> 3-phosphonato-D-glycerate(3-)[c] + ATP	adp + 13dpg_c <=> atp + 3pg_c
Phosphoglycerate mutase	GPM1/ GPM2/ GPM3	3-phosphonato-D-glycerate(3-)[c] <=> 2-phospho-D-glyceric acid[c]	3pg_c <=> 2pg_c
Enolase	ENO1/ ENO2	2-phospho-D-glyceric acid[c] <=> phosphoenolpyruvate[c]	2pg_c <=> pep_c
Pyruvate kinase	PYK1/ PYK2	ADP + phosphoenolpyruvate[c] => ATP + pyruvate[c]	adp + pep_c => atp + pyr_c
Mannitol utilization
D-Mannitol:NAD+ 2-oxidoreductase	DSF1/ MAN2	NAD[c] + Mannitol[c] <=> D-fructose[c] + NADH[c]	man_c + nad_c => fru_c + nadh_c
Hexokinase	HXK1/ HXK2	ATP + D-fructose[c] => ADP+ D-fructose 6-phosphate[c]	fru_c + atp => adp + f6p_c
Pentose phosphate pathway
Glucose-6-phosphate 1-dehydrogenase	ZWF1	D-glucose 6-phosphate[c] + NADP[c] => 6-O-phosphono-D-glucono-1,5-lactone[c] + NADPH[c]	g6p_c + nadp_c => 6pgl_c + nadph_c
6-phosphogluconolactonase	SOL1/ SOL2/ SOL3/ SOL4	6-O-phosphono-D-glucono-1,5-lactone[c] => 6-phospho-D-gluconate[c]	6pgl_c => 6pgc_c
6-phosphogluconate dehydrogenase	GND2/ GND1	6-phospho-D-gluconate[c] + NADP[c] => CO2[c] + D-ribulose 5-phosphate[c] + NADPH[c]	nadp_c + 6pgc_c => co2 + nadph_c + ru5p_c
Ribose 5-phosphate isomerase A	RKI1	D-ribulose 5-phosphate[c] <=> ribose-5-phosphate[c]	ru5p_c <=> r5p_c
Ribulose-phosphate 3-epimerase	RPE1	D-ribulose 5-phosphate[c] <=> D-xylulose 5-phosphate[c]	ru5p_c <=> xu5p_c
Transketolase	TKL2/ TKL1	D-xylulose 5-phosphate[c] + ribose-5-phosphate[c] <=> glyceraldehyde 3-phosphate[c] + sedoheptulose 7-phosphate[c]	xu5p_c + r5p_c <=> g3p_c + s7p_c
Transaldolase	NOM1	glyceraldehyde 3-phosphate[c] + sedoheptulose 7-phosphate[c] <=> D-erythrose 4-phosphate[c] + D-fructose 6-phosphate[c]	g3p_c + s7p_c <=> f6p_c + e4p_c
Transketolase	TKL2/ TKL1	D-erythrose 4-phosphate[c] + D-xylulose 5-phosphate[c] <=> D-fructose 6-phosphate[c] + glyceraldehyde 3-phosphate[c]	xu5p_c + e4p_c <=> f6p_c + g3p_c
Gluconeogenesis, anaplerotic reactions, pyruvate dehydrogenase bypass and side product formation
Fructose-1,6-bisphosphatase	FBP1	D-fructose 1,6-bisphosphate[c] + => D-fructose 6-phosphate[c]	fdp_c => f6p_c
Pyruvate carboxylase	PYC1/ PYC2	ATP + CO2 + pyruvate[c] => ADP + oxaloacetate[c]	atp + pyr_c + co2 => adp + oaa_c
Phosphoenolpyruvate carboxykinase	PCK1	ATP + oxaloacetate[c] => ADP + CO2 + phosphoenolpyruvate[c]	atp + oaa_c => adp + pep_c + co2
Pyruvate decarboxylase	PDC1/ PDC5/ PDC6	pyruvate[c] => acetaldehyde[c] + CO2	pyr_c => co2 + acald_c
Alcohol dehydrogenase	ADH1/ ADH2/ ADH4/ ADH5/	acetaldehyde[c] + NADH[c] <=> ethanol[c] + NAD[c]	nadh_c + acald_c <=> nad_c + etoh_c
Mg(2+)-ACDH; Mg(2+)-activated acetaldehyde dehydrogenase	ALD6	NADP[c] + acetaldehyde[c] ==> NADPH[c] + acetate[c]	nadp_c + acald_c => nadph_c + ac_c
Aldehyde dehydrogenase	ALD2/ ALD3	NAD[c] + acetaldehyde[c] ==> NADH[c] + acetate[c]	nad_c + acald_c => nadh_c + ac_c
Acetyl-CoA synthetase	ACS2	acetate[c] + ATP => acetyl-CoA[c] + AMP	atp + ac_c => accoa_c + amp_c
Glycerol-3-phosphate dehydrogenase	GPD1/ GPD2	dihydroxyacetone phosphate[c] + NADH[c] <=> glycerol 3-phosphate[c] + NAD[c]	nadh_c + dhap_c <=> nad_c + glyc3p_c
Glycerol-3-phosphatase	HOR2/ RHR2	glycerol 3-phosphate[c] => glycerol[c]	glyc3p_c => glyc_c
Pyruvate dehydrogenase complex, citric acid cycle and mitochondrial reactions
Pyruvate dehydrogenase complex	PDB1/ LAT1/ PDX1/ PDA1/ LPD1	NAD[m] + pyruvate[m] => acetyl-CoA[m] + CO2 + NADH[m]	pyr_m + nad_m => accoa_m + co2 + nadh_m
Citrate synthase	CIT1/ CIT3	acetyl-CoA[m] + oxaloacetate[m] => citrate[m]	accoa_m + oaa_m => cit_m
citrate hydroxymutase	ACO1	citrate[m] <=> isocitrate[m]	cit_m <=> icit_m
Isocitrate dehydrogenase [NAD]	IDH1/ IDH2	NAD[m] + isocitrate[m] => CO2 + NADH[m] + a-ketoglutarate[m]	nad_m + icit_m => co2 + nadh_m + akg_m
Isocitrate dehydrogenase [NADP]	IDP1	NADP[m] + isocitrate[m] => CO2 + NADPH[m] + a-ketoglutarate[m]	icit_m + nadp_m => co2 + akg_m + nadph_m
Alpha-ketoglutarate dehydrogenase, Dihydrolipoyl dehydrogenase	KGD1/ KGD2/ LPD1	NAD[m] + a-ketoglutarate[m] => CO2 + NADH[m] + succinyl-CoA[m]	nad_m + akg_m => co2 + nadh_m + succoa_m
Succinyl-CoA ligase	LSC1/ LSC2	ADP + succinyl-CoA[m] <=> ATP + succinate[m]	adp_c + succoa_m <=> atp + succ_m
Succinate dehydrogenase complex	SDH4/ SDH3/ SDH1/ SDH2	FAD[m] + succinate[m] <=> FADH2[m] + fumarate[m]	succ_m + fad_m <=> fum_m + fadh2_m
Fumarate hydratase	FUM1	Fumarate[m] <=> malate[m]	fum_m <=> mal_m
Malate dehydrogenase	MDH1	NAD[m] + malate[m] <=> NADH[m] + oxaloacetate[m]	nad_m + mal_m <=> nadh_m + oaa_m
Malic enzyme	MAE1	NADP[m] + malate => CO2 + NADPH[m] + pyruvate[m]	mal_m + nadp_m => pyr_m + co2 + nadph_m
Malic enzyme	MAE1	NAD[m] + malate => CO2 + NADH[m] + pyruvate[m]	nad_m + mal_m => pyr_m + co2 + nadh_m
Alcohol dehydrogenases	ADH1/ ADH2/ ADH3/ ADH4/ ADH5	NAD[m] + ethanol[m] <=> NADH[m] + acetaldehyde[m]	nad_m + etoh_m <=> nadh_m + acald_m
ALdehyde dehydrogenase	ALD4	NAD[m] + acetaldehyde[m] => NADH[m] + acetate[m]	nad_m + acald_m => nadh_m + ac_m
Aldehyde dehydrogenase	ALD4/ ALD5	NADP[m] + acetaldehyde[m] => NADPH[m] + acetate[m]	nadp_m + acald_m => nadph_m + ac_m
Acetyl-CoA synthetase	ACS1/ ACS2	ATP + acetate[m] => AMP + acetyl-CoA [m]	atp + ac_m => accoa_m + amp
Mitochondrial shuttles
NAD/NADH shuttle	-	NADH[c] + NAD[m] => NADH[m] + NAD[c]	nadh_c + nad_m => nad_c + nadh_m
Transport: mitochondrial pyruvate carrier	FMP37	pyruvate[c] <=> pyruvate[m]	pyr_c <=> pyr_m
Transport: mitochondrial inner membrane transporter	OAC1	oxaloacetate[c] <=> oxaloacetate[m]	oaa_c <=> oaa_m
Transport	-	ethanol[c] <=> ethanol[m]	etoh_c <=> etoh_m
Transport	-	acetaldehyde[c] <=> acetaldehyde[m]	acald_c <=> acald_m
Transport	-	acetate[c] <=> acetate[m]	ac_c <=> ac_m
MVA pathway
Acetyl-CoA C-acetyltransferase	ERG10	2 acetyl-CoA[c] <=> acetoacetyl-CoA[c]	2 accoa_c <=> aacoa_c
Hydroxymethylglutaryl-CoA synthase	ERG13	acetyl-CoA[c] + acetoacetyl-CoA[c] <=> 3-hydroxy-3-methylglutaryl-CoA[c]	accoa_c + aacoa_c <=> hmgcoa_c
Hydroxymethylglutaryl-CoA reductase (NADPH)	HMG1/ HMG2	3-hydroxy-3-methylglutaryl-CoA[c] + 2 NADPH[c] <=> 2 NADP[c] + mevalonate[c]	2 nadph_c + hmgcoa_c <=> 2 nadp_c + mev_R_c
Mevalonate kinase	ERG12	ATP + mevalonate[c] => 5-phosphomevalonate[c] + ADP	atp + mev_R_c => adp + 5pmev_c
Phosphomevalonate kinase	ERG8	5-phosphomevalonate[c] + ATP => 5-diphosphomevalonate[c] + ADP	atp + 5pmev_c => adp + 5dpmev_c
Diphosphomevalonate decarboxylase	ERG19	5-diphosphomevalonate[c] + ATP <=> ADP + CO2 + isopentenyl-diphosphate[c]	atp + 5dpmev_c <=> adp + ipdp_c + co2
Isopentenyl-diphosphate D-isomerase	IDI1	isopentenyl diphosphate[c] <=> prenyl diphosphate(3-)[c]	ipdp_c <=> dmpp_c
Dimethylallyltranstransferase	ERG20	isopentenyl diphosphate[c] + prenyl diphosphate(3-)[c] => geranyl diphosphate[c]	ipdp_c + dmpp_c => grdp_c
Dimethylallyltranstransferase	ERG20	geranyl diphosphate[c] + isopentenyl diphosphate[c] => farnesyl diphosphate[c]	ipdp_c + grdp_c => frdp_c
Valencene synthase	CnVS	farnesyl diphosphate[c] => valencene[c]	frdp_c => val_c
Oxidative phosphorylation and ATP maintenance
Respiratory chain: NADH dehydrogenase and F1F0 ATP synthase	NDE1/ NDE2/ ATP1/ ATP16 ATP17/ ATP2/ ATP7/ ATP14/ ATP6/ ATP9/ ATP15	24 ADP + 20 NADH[m] + 10 O2 => 24 ATP + 20 NAD[m]	24 adp + 10 o2 + 20 nadh_m => 24 atp + 20 nad_m
Respiratory chain: Succinate dehydrogenase complex and F1F0 ATP synthase	SDH4/ SDH3/ SDH1/ SDH2/ ATP1/ ATP16/ ATP17/ ATP2/ ATP7/ ATP14/ ATP6/ ATP9/ ATP15	24 ADP + 20 FADH2 + 10 O2 => 24 ATP + 20 FAD	24 adp + 10 o2 + 20 fadh2_m => 24 atp + 20 fad_m
ATP maintenace	-	ATP => ADP	atp => adp
Adenylate kinase	ADK2/ ADK1	AMP + ATP => 2 ADP	atp + amp => 2 adp
Biomass formation
6 3-P-glycerate + 254 ATP + 24 AcCoA[c] + 3 AcCoA[m] + 90 NADPH[c] + 22 NADPH[m] + 16 NAD[c] + 6 NAD[m] + 6 PEP + 11 a-ketoglutarate + 3 erythrose-4-P + 25 glucose-6-P + glycerol-P + 10 oxaloacetate[c] + 18 pyruvate[c] + 3 ribose-5-P ==> 254 ADP + BIOMASS + 16 NADH[c] + 6 NADH[m] + 90 NADP[c] + 22 NADP[m]
